# Supplementary material for: Genomic profiling reveals high frequency of DNA repair genetic aberrations in gallbladder cancer
Source: PubMed Central journal article supplement (PMC7745036; doi:10.1038/s41598-020-77939-6), 2020-12-16

## **Genomic profiling reveals high frequency of DNA repair genetic aberrations in gallbladder cancer.**

**Authors:** Reham Abdel-Wahab, MD, PhD<sup>1,9,10</sup>, Timothy Yap, MD, PhD<sup>2</sup>, Russell Madison, PhD<sup>4</sup>, Shubham Pant, MD<sup>1,2</sup>, Matthew Cooke, PhD<sup>4</sup>, Kai Wang, MD, PhD<sup>4,5,7</sup>, Zhao Haitao, MD, PhD<sup>8</sup>, Tanios Bekaii-Saab, MD<sup>6</sup>, Elif Karatas, MD<sup>1</sup>, Lawrence Kwong, PhD<sup>3</sup>, Funda Meric-Bernstam, MD<sup>2</sup>, Mitesh Borad, MD<sup>6</sup>, Milind Javle, MD<sup>1\*</sup>

### **Authors Affiliations:**

<sup>1</sup>Department of Gastrointestinal Medical Oncology, The University of Texas MD Anderson Cancer Center, Houston, TX, USA

<sup>2</sup>Investigational Cancer Therapeutics, The University of Texas MD Anderson Cancer Center, Houston, TX, USA

<sup>3</sup>Department of Translational Molecular Pathology, The University of Texas MD Anderson Cancer Center, Houston, TX, USA

<sup>4</sup>Foundation Medicine, Cambridge, MA, USA

<sup>5</sup>OrigiMed, Shanghai, China

<sup>6</sup>Mayo Clinic, Rochester, MN, USA

<sup>7</sup>Zhejiang University International Hospital, Hangzhou, China

<sup>8</sup>Peking Union Medical College, Beijing, China

<sup>9</sup>Department of Clinical Oncology, Assiut University Hospital, Assiut, Egypt

<sup>10</sup>Cholangiocarcinoma Foundation, Utah, USA

### **Correspondence:**

Milind Javle, MD, Department of Gastrointestinal Medical Oncology, Unit 426, The University of Texas MD Anderson Cancer Center, 1515 Holcombe Blvd., Houston, TX 77030. Telephone: 713-792-2828; Fax: 713-745-1163; E-mail: [mjavle@mdanderson.org](mailto:mjavle@mdanderson.org)

**Key Words:** gallbladder cancer; DNA repair genetic aberrations; targeted therapy

**Word count:** 3080

**Number of Figures:** 5 figures and 9 supplemental figures

**Number of Tables:** 2 tables and 1 supplemental table

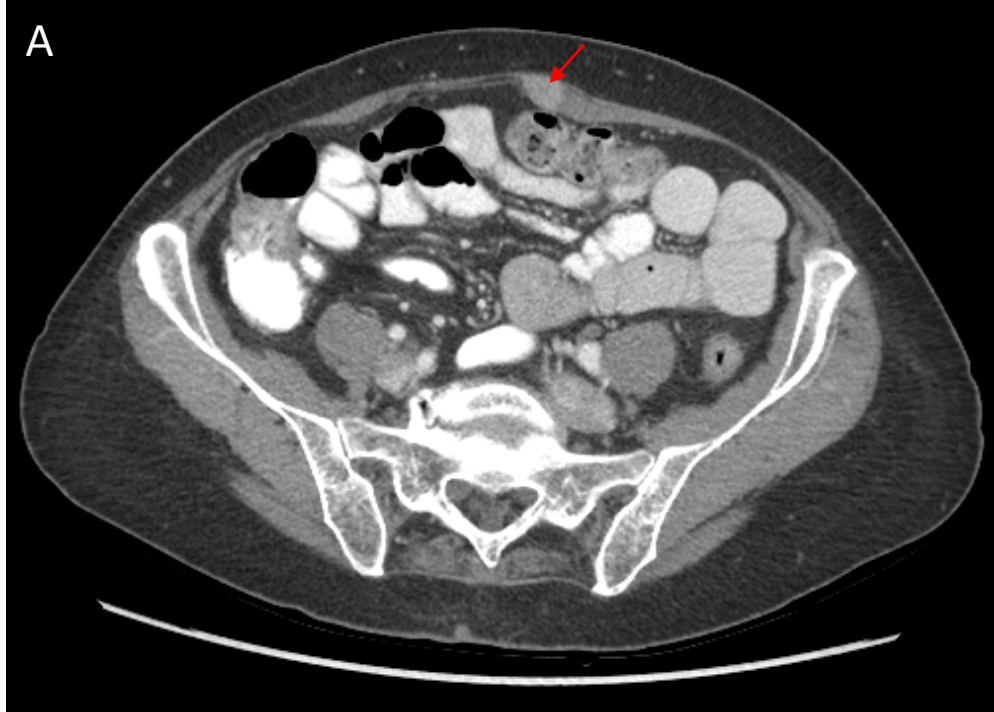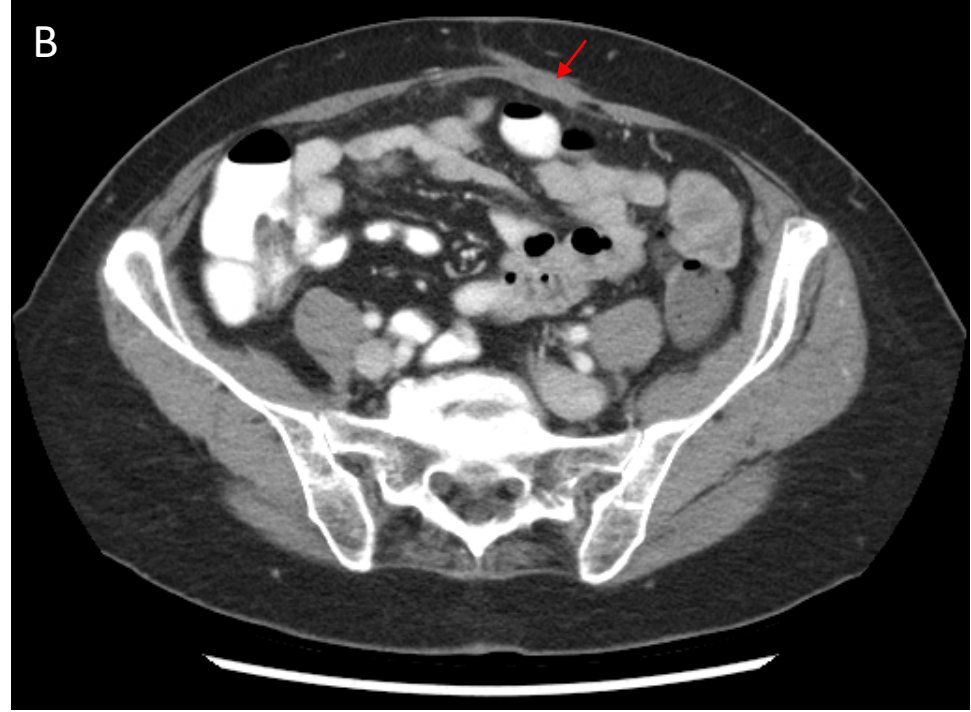

Supplement: 41598_2020_77939_MOESM10_ESM.pdf [file 41598_2020_77939_MOESM10_ESM.pdf]
