# Supplementary material for: Genomic profiling reveals high frequency of DNA repair genetic aberrations in gallbladder cancer
Source: PubMed Central journal article supplement (PMC7745036; doi:10.1038/s41598-020-77939-6), 2020-12-16
Supplement: 41598_2020_77939_MOESM12_ESM.pdf [file 41598_2020_77939_MOESM12_ESM.pdf]

**Supplemental Table 1: Patients' demographic pathological characteristics**

| <b>Parameter</b>       | <b>No. (%)<br/>N = 760</b> |
|------------------------|----------------------------|
| Age, median (range), y | 64 (25-88)                 |
| Sex                    |                            |
| Female : male ratio    | 2.2 : 1                    |
| Male                   | 235 (31.0%)                |
| Female                 | 525 (69.0%)                |
| Biopsy site            |                            |
| Gallbladder            | 371 (48.8%)                |
| Lymph node             | 47 (6.2%)                  |
| Liver                  | 164 (21.7%)                |
| Soft tissue            | 21 (2.8%)                  |
| Ovary                  | 6 (0.8%)                   |
| Peritoneum             | 37 (4.9%)                  |
| Omentum                | 26 (3.4%)                  |
| Bile duct              | 7 (0.9%)                   |
| Pelvis                 | 2 (0.3%)                   |
| Appendix               | 2 (0.3%)                   |
| Peritoneal fluid       | 3 (0.4%)                   |
| Iliac crest            | 1 (0.1%)                   |
| Duodenum               | 5 (0.7%)                   |
| Abdomen                | 6 (0.8%)                   |
| Abdominal wall         | 18 (2.4%)                  |
| Muscle                 | 1 (0.1%)                   |
| Diaphragm              | 1 (0.1%)                   |
| Pleural fluid          | 2 (0.3%)                   |
| Lung                   | 9 (1.2%)                   |
| Skin                   | 2 (0.3%)                   |
| Brain                  | 2 (0.3%)                   |
| Stomach                | 1 (0.1%)                   |
| Pancreas               | 2 (0.3%)                   |
| Colon                  | 3 (0.4%)                   |
| Bone                   | 2 (0.3%)                   |
| Fallopian tube         | 2 (0.3%)                   |
| Small Intestine        | 2 (0.3%)                   |
| Adrenal gland          | 1 (0.1%)                   |
| Ampulla of Vater       | 1 (0.1%)                   |
| Retroperitoneum        | 1 (0.1%)                   |
| Unknown                | 12 (1.6%)                  |
